# Supplementary material for: The Isoform GC1f of the Vitamin D Binding Protein Is Associated with Bronchiectasis Severity
Source: Biomedicines. 2021 Oct 29;9(11):1573. doi: 10.3390/biomedicines9111573 (PMC8615139; doi:10.3390/biomedicines9111573)
Supplement: Supplementary file 1 [file biomedicines-09-01573-s001.zip › biomedicines-1399500-Supplementary material-update.pdf]

## TITLE

**The isoform GC1f of the vitamin D binding protein is associated to bronchiectasis severity****Authors**

Martina Oriano <sup>1,2,\*</sup>, Stefano Aliberti <sup>3,4,\*</sup>, Franca Rosa Guerini <sup>5,\*</sup>, Cristina Agliardi <sup>5</sup>, Carlotta Di Francesco <sup>1,2</sup>, Alice Gelmini <sup>1,2</sup>, Leonardo Terranova <sup>1,2</sup>, Milena Zanzottera <sup>5</sup>, Paola Marchisio <sup>1,6</sup>, Mario Clerici <sup>1,5,\*</sup> and Francesco Blasi <sup>1,2</sup>

**Table S1. Clinical characteristics of the study population presented as median (IQR) or n (%)**

| <b>Demography</b>                            |                   |
|----------------------------------------------|-------------------|
| Sex (Female)                                 | 78 (67.2%)        |
| Age                                          | 62.0 (48.8, 72.0) |
| BMI                                          | 21.7 (19.0, 24.9) |
| <b>Radiology</b>                             |                   |
| Reiff score                                  | 4.0 (3.0, 6.0)    |
| <b>Disease severity</b>                      |                   |
| BSI score                                    | 6.0 (4.0, 9.0)    |
| BSI risk classes                             | 40 (34.5%)        |
|                                              | 38 (32.8%)        |
|                                              | 38 (32.8%)        |
| FACED score                                  | 2.0 (1.0, 4.0)    |
| FACED risk classes                           | 63 (54.3%)        |
|                                              | 41 (35.3%)        |
|                                              | 12 (10.3%)        |
| <b>Clinical status</b>                       |                   |
| Exacerbation in the previous year            | 2.0 (1.0, 3.0)    |
| Hospitalization (at least one previous year) | 13 (11.3%)        |
| <b>Comorbidities</b>                         |                   |
| Osteoporosis                                 | 8 (6.9%)          |
| Depression                                   | 12 (10.3%)        |
| Anxiety                                      | 5 (4.3%)          |
| Asthma                                       | 20 (17.2%)        |
| <b>Lung function</b>                         |                   |
| FEV1%                                        | 84.0 (69.2, 99.0) |
| FEV1%<50%                                    | 15 (13.2%)        |
| FEV1%<35%                                    | 8 (7.0%)          |
| <b>Standard microbiology</b>                 |                   |
| Chronic infection                            | 50 (49.0%)        |
| Chronic <i>P. aeruginosa</i>                 | 30 (29.4%)        |
| Chronic <i>H. influenzae</i>                 | 6 (5.9%)          |
| Chronic MSSA                                 | 8 (7.8%)          |
| Chronic <i>A. xylosoxidans</i>               | 2 (2.0%)          |

|                            |                   |
|----------------------------|-------------------|
| Chronic Others             | 4 (3.9%)          |
| <b>Aetiology</b>           |                   |
| Idiopathic                 | 63 (54.3%)        |
| Primary Ciliary Dyskinesia | 10 (8.6%)         |
| Primary immunodeficiency   | 13 (11.2%)        |
| Post Infective             | 6 (5.2%)          |
| Secondary Immunodeficiency | 6 (5.2%)          |
| Others*                    |                   |
| <b>QoL-B questionnaire</b> |                   |
| Physical section           | 60.0 (40.9, 80.0) |
| Role section               | 66.7 (53.3, 86.7) |
| Vitality section           | 55.6 (33.3, 69.5) |
| Emotion section            | 75.0 (58.3, 91.7) |
| Social section             | 66.7 (41.7, 83.3) |
| Treatment Burden section   | 66.7 (55.6, 77.8) |
| Health section             | 41.7 (22.2, 58.3) |
| Respiration section        | 74.1 (59.3, 81.5) |
| <b>Vitamin D</b>           |                   |
| Vitamin D (ng/mL)          | 20.4 (13.0, 28.4) |

\* Other includes COPD, Connective Tissue Diseases, Alpha1-antitrypsin deficiency, ABPA, Asthma, CFTR-RD, Aspiration

**Table S2: SNPs in GC gene in bronchiectasis patients**

| SNPs   | Genotype | Bronchiectasis n (%) |
|--------|----------|----------------------|
| rs7041 | A A      | 21(18.1)%            |
|        | A C      | 58(50.0)%            |
|        | C C      | 37(31.9)%            |
| rs4588 | G G      | 61(52.6)%            |
|        | G T      | 47(40.5)%            |
|        | T T      | 8(6.9)%              |
| SNPs   | Allele   | Bronchiectasis n (%) |

|        |   |             |
|--------|---|-------------|
| rs7041 | A | 100 (43.1%) |
|        | C | 132(56.9%)  |
| rs4588 | G | 169(72.8%)  |
|        | T | 63(27.2%)   |

**Table S3. Comparison of clinical characteristics of patients with GC2 isoform vs other isoforms**

| <b>Demography</b>                            |          |                       |                                  |                |
|----------------------------------------------|----------|-----------------------|----------------------------------|----------------|
|                                              |          | <b>GC2<br/>(N=55)</b> | <b>Other isoforms<br/>(N=61)</b> | <b>p-value</b> |
| Sex (Female)                                 |          | 33 (60.0%)            | 45 (73.8%)                       | 0.115          |
| Age                                          |          | 62.0 (46.0, 71.0)     | 62.0 (54.0, 72.0)                | 0.453          |
| BMI                                          |          | 22.0 (19.0, 25.8)     | 21.3 (19.0, 24.0)                | 0.328          |
| <b>Radiology</b>                             |          |                       |                                  |                |
| Reiff score                                  |          | 4.0 (2.0, 5.0)        | 4.0 (3.0, 6.0)                   | 0.77           |
| <b>Disease severity</b>                      |          |                       |                                  |                |
| BSI score                                    |          | 5.0 (3.0, 9.0)        | 8.0 (4.0, 10.0)                  | 0.081          |
| BSI risk classes                             | mild     | 23 (41.8%)            | 17 (27.9%)                       | 0.288          |
|                                              | moderate | 16 (29.1%)            | 22 (36.1%)                       |                |
|                                              | severe   | 16 (29.1%)            | 22 (36.1%)                       |                |
| BSI Moderate-severe                          |          | 32 (58.2%)            | 44 (72.1%)                       | 0.114          |
| BSI Severe                                   |          | 16 (29.1%)            | 22 (36.1%)                       | 0.424          |
| FACED score                                  |          | 2.0 (1.0, 4.0)        | 2.0 (1.0, 4.0)                   | 0.574          |
| FACED risk classes                           | mild     | 31 (56.4%)            | 32 (52.5%)                       | 0.854          |
|                                              | moderate | 18 (32.7%)            | 23 (37.7%)                       |                |
|                                              | severe   | 6 (10.9%)             | 6 (9.8%)                         |                |
| FACED Moderate-severe                        |          | 24 (43.6%)            | 29 (47.5%)                       | 0.673          |
| FACED Severe                                 |          | 6 (10.9%)             | 6 (9.8%)                         | 0.85           |
| <b>Clinical status</b>                       |          |                       |                                  |                |
| Exacerbation in the previous year            |          | 2.0 (1.0, 3.0)        | 2.0 (1.0, 3.0)                   | 0.397          |
| Hospitalization (at least one previous year) |          | 2 (3.6%)              | 11 (18.0%)                       | 0.015          |
| <b>Comorbidities</b>                         |          |                       |                                  |                |
| BACI                                         |          | 0.0 (0.0, 3.0)        | 0.0 (0.0, 2.0)                   | 0.317          |
| Osteoporosis                                 |          | 1 (1.8%)              | 7 (11.5%)                        | 0.040          |
| Depression                                   |          | 4 (7.3%)              | 8 (13.1%)                        | 0.302          |
| Anxiety                                      |          | 1 (1.8%)              | 4 (6.6%)                         | 0.209          |
| Asthma                                       |          | 12 (21.8%)            | 8 (13.1%)                        | 0.215          |
| <b>Lung function</b>                         |          |                       |                                  |                |
| FEV1%                                        |          | 84.5 (70.0, 99.0)     | 81.5 (68.8, 101.0)               | 0.901          |
| FEV1%<50%                                    |          | 7 (13.0%)             | 8 (13.3%)                        | 0.953          |
| FEV1%<35%                                    |          | 4 (7.4%)              | 4 (6.7%)                         | 0.877          |
| <b>Standard microbiology</b>                 |          |                       |                                  |                |
| Chronic infection                            |          | 22 (50.0%)            | 28 (48.3%)                       | 0.863          |
| Chronic <i>P. aeruginosa</i>                 |          | 15 (34.1%)            | 15 (25.9%)                       | 0.366          |
| Chronic <i>H. influenzae</i>                 |          | 3 (6.8%)              | 3 (5.2%)                         | 0.726          |
| Chronic MSSA                                 |          | 2 (4.5%)              | 6 (10.3%)                        | 0.281          |

|                                |                   |                   |       |
|--------------------------------|-------------------|-------------------|-------|
| Chronic <i>A. xylosoxidans</i> | 2 (4.5%)          | 0 (0.0%)          | 0.101 |
| Chronic Others                 | 1 (2.3%)          | 3 (5.2%)          | 0.455 |
| <b>Aetiology</b>               |                   |                   |       |
| Idiopathic                     | 37 (67.3%)        | 26 (42.6%)        | 0.292 |
| Primary Ciliary Dyskinesia     | 4 (7.3%)          | 6 (9.8%)          |       |
| Primary immunodeficiency       | 6 (10.9%)         | 7 (11.5%)         |       |
| Post Infective                 | 2 (3.6%)          | 4 (6.6%)          |       |
| Secondary Immunodeficiency     | 2 (3.6%)          | 4 (6.6%)          |       |
| Others*                        | 4 (7.3%)          | 14 (23.2%)        |       |
| <b>QoL-B questionnaire</b>     |                   |                   |       |
| Physical section               | 60.0 (46.7, 83.3) | 63.4 (40.0, 80.0) | 0.894 |
| Role section                   | 80.0 (53.3, 86.7) | 66.7 (53.3, 86.7) | 0.333 |
| Vitality section               | 55.6 (33.3, 66.7) | 55.6 (33.3, 72.2) | 0.872 |
| Emotion section                | 75.0 (50.0, 91.7) | 79.2 (58.3, 91.7) | 0.482 |
| Social section                 | 75.0 (41.7, 83.3) | 57.0 (41.7, 83.3) | 0.362 |
| Treatment Burden section       | 66.7 (55.6, 77.8) | 66.7 (55.6, 77.8) | 0.913 |
| Health section                 | 41.7 (25.0, 66.7) | 33.3 (20.8, 58.3) | 0.627 |
| Respiration section            | 74.1 (62.5, 81.5) | 72.2 (58.3, 85.2) | 0.919 |
| <b>Vitamin D</b>               |                   |                   |       |
| Vitamin D (ng/mL)              | 19.5 (13.0, 26.8) | 20.5 (13.2, 29.7) | 0.536 |

\* Other includes COPD, Connective Tissue Diseases, Alpha1-antitrypsin deficiency, ABPA, Asthma, CFTR-RD, Aspiration

**Table S4. Comparison of clinical characteristics of patients among isoform phenotypes**

| <b>Demography</b>                            |                             |                             |                            |                            |                          |                |
|----------------------------------------------|-----------------------------|-----------------------------|----------------------------|----------------------------|--------------------------|----------------|
|                                              | <b>GC1s-GC1f<br/>(N=24)</b> | <b>GC1s-GC1s<br/>(N=37)</b> | <b>GC2-GC1f<br/>(N=13)</b> | <b>GC2-GC1s<br/>(N=34)</b> | <b>GC2-GC2<br/>(N=8)</b> | <b>p-value</b> |
| Sex (Female)                                 | 17 (70.8%)                  | 28 (75.7%)                  | 9 (69.2%)                  | 19 (55.9%)                 | 5 (62.5%)                | 0.488          |
| Age                                          | 61.0 (51.8, 72.2)           | 63.0 (54.0, 72.0)           | 62.0 (53.0, 69.0)          | 60.0 (44.5, 70.2)          | 66.0 (46.8, 72.8)        | 0.737          |
| BMI                                          | 21.5 (19.7, 25.0)           | 21.3 (19.0, 24.0)           | 22.0 (19.0, 25.0)          | 21.9 (18.9, 25.4)          | 22.9 (21.0, 26.5)        | 0.739          |
| <b>Radiology</b>                             |                             |                             |                            |                            |                          |                |
| Reiff score                                  | 4.0 (2.0, 6.0)              | 4.0 (3.0, 6.0)              | 4.0 (3.0, 6.0)             | 4.0 (2.0, 4.0)             | 3.0 (2.0, 4.2)           | 0.757          |
| <b>Disease severity</b>                      |                             |                             |                            |                            |                          |                |
| BSI score                                    | 7.5 (3.8, 10.0)             | 8.0 (5.0, 9.0)              | 6.0 (5.0, 11.0)            | 5.0 (3.0, 8.8)             | 4.0 (3.8, 8.5)           | 0.196          |
| BSI risk classes                             | mild                        | 9 (37.5%)                   | 8 (21.6%)                  | 2 (15.4%)                  | 16 (47.1%)               | 5 (62.5%)      |
|                                              | moderate                    | 6 (25.0%)                   | 16 (43.2%)                 | 6 (46.2%)                  | 9 (26.5%)                | 1 (12.5%)      |
|                                              | severe                      | 9 (37.5%)                   | 13 (35.1%)                 | 5 (38.5%)                  | 9 (26.5%)                | 2 (25.0%)      |
| FACED score                                  | 2.0 (1.0, 3.2)              | 3.0 (1.0, 4.0)              | 3.0 (2.0, 4.0)             | 2.0 (1.0, 3.0)             | 2.5 (1.8, 4.0)           | 0.556          |
| FACED risk classes                           | mild                        | 15 (62.5%)                  | 17 (45.9%)                 | 6 (46.2%)                  | 21 (61.8%)               | 4 (50.0%)      |
|                                              | moderate                    | 5 (20.8%)                   | 18 (48.6%)                 | 4 (30.8%)                  | 10 (29.4%)               | 4 (50.0%)      |
|                                              | severe                      | 4 (16.7%)                   | 2 (5.4%)                   | 3 (23.1%)                  | 3 (8.8%)                 | 0 (0.0%)       |
| <b>Clinical status</b>                       |                             |                             |                            |                            |                          |                |
| Exacerbation in the previous year            | 3.0 (2.0, 3.0)              | 2.0 (1.0, 4.0)              | 1.0 (1.0, 3.2)             | 2.5 (1.0, 3.0)             | 2.0 (1.8, 3.0)           | 0.878          |
| Hospitalization (at least one previous year) | 7 (29.2%)                   | 4 (10.8%)                   | 0 (0.0%)                   | 0 (0.0%)                   | 2 (25.0%)                | 0.005 (1)      |
| <b>Comorbidities</b>                         |                             |                             |                            |                            |                          |                |
| BACI                                         | 0.0 (0.0, 2.2)              | 0.0 (0.0, 0.0)              | 0.0 (0.0, 3.0)             | 0.0 (0.0, 2.2)             | 3.0 (0.0, 4.2)           | 0.223          |

|                                |                    |                   |                    |                    |                   |           |
|--------------------------------|--------------------|-------------------|--------------------|--------------------|-------------------|-----------|
| Osteoporosis                   | 2 (8.3%)           | 5 (13.5%)         | 0 (0.0%)           | 1 (2.9%)           | 0 (0.0%)          | 0.289     |
| Depression                     | 2 (8.3%)           | 6 (16.2%)         | 0 (0.0%)           | 4 (11.8%)          | 0 (0.0%)          | 0.409     |
| Anxiety                        | 1 (4.2%)           | 3 (8.1%)          | 0 (0.0%)           | 1 (2.9%)           | 0 (0.0%)          | 0.663     |
| Asthma                         | 1 (4.2%)           | 7 (18.9%)         | 1 (7.7%)           | 7 (20.6%)          | 4 (50.0%)         | 0.039 (2) |
| Lung function                  |                    |                   |                    |                    |                   |           |
| FEV1%                          | 81.0 (72.5, 102.5) | 82.0 (68.0, 97.0) | 73.0 (54.0, 99.0)  | 88.0 (72.0, 101.0) | 84.0 (74.8, 86.5) | 0.7       |
| FEV1%<50%                      | 3 (13.0%)          | 5 (13.5%)         | 3 (23.1%)          | 3 (9.1%)           | 1 (12.5%)         | 0.808     |
| FEV1%<35%                      | 1 (4.3%)           | 3 (8.1%)          | 2 (15.4%)          | 1 (3.0%)           | 1 (12.5%)         | 0.577     |
| Standard microbiology          |                    |                   |                    |                    |                   |           |
| Chronic infection              | 12 (57.1%)         | 16 (43.2%)        | 9 (75.0%)          | 13 (48.1%)         | 0 (0.0%)          | 0.059     |
| Chronic <i>P. aeruginosa</i>   | 6 (28.6%)          | 9 (24.3%)         | 6 (50.0%)          | 9 (33.3%)          | 0 (0.0%)          | 0.267     |
| Chronic <i>H. influenzae</i>   | 2 (9.5%)           | 1 (2.7%)          | 0 (0.0%)           | 3 (11.1%)          | 0 (0.0%)          | 0.467     |
| Chronic MSSA                   | 4 (19.0%)          | 2 (5.4%)          | 0 (0.0%)           | 2 (7.4%)           | 0 (0.0%)          | 0.248     |
| Chronic <i>A. xylosoxidans</i> | 0 (0.0%)           | 0 (0.0%)          | 1 (8.3%)           | 1 (3.7%)           | 0 (0.0%)          | 0.377     |
| Chronic Others                 | 1 (4.8%)           | 2 (5.4%)          | 1 (8.3%)           | 0 (0.0%)           | 0 (0.0%)          | 0.702     |
| Aetiology                      |                    |                   |                    |                    |                   |           |
| Idiopathic                     | 8 (33.3%)          | 18 (48.6%)        | 9 (69.2%)          | 21 (61.8%)         | 7 (87.5%)         | 0.631     |
| Primary Ciliary Dyskinesia     | 5 (20.8%)          | 1 (2.7%)          | 0 (0.0%)           | 4 (11.8%)          | 0 (0.0%)          |           |
| Primary immunodeficiency       | 1 (4.2%)           | 6 (16.2%)         | 3 (23.1%)          | 2 (5.9%)           | 1 (12.5%)         |           |
| Post Infective                 | 3 (12.5%)          | 1 (2.7%)          | 0 (0.0%)           | 2 (5.9%)           | 0 (0.0%)          |           |
| Secondary Immunodeficiency     | 3 (12.5%)          | 1 (2.7%)          | 1 (7.7%)           | 1 (2.9%)           | 0 (0.0%)          |           |
| Others*                        | 4 (16.7%)          | 10 (27.1%)        | 0 (0%)             | 4 (11.7%)          | 0 (0%)            |           |
| QoL-B questionnaire            |                    |                   |                    |                    |                   |           |
| Physical section               | 66.7 (43.4, 96.7)  | 60.0 (40.0, 74.2) | 61.2 (46.6, 68.4)  | 63.4 (46.7, 85.9)  | 53.3 (30.0, 73.3) | 0.72      |
| Role section                   | 73.3 (53.3, 93.3)  | 60.0 (48.4, 81.7) | 70.0 (58.3, 88.4)  | 80.0 (55.0, 86.7)  | 80.0 (60.0, 86.7) | 0.652     |
| Vitality section               | 66.7 (47.2, 77.8)  | 55.6 (33.3, 66.7) | 55.6 (44.4, 77.8)  | 55.6 (33.3, 66.7)  | 55.6 (38.9, 72.2) | 0.803     |
| Emotion section                | 83.3 (75.0, 95.8)  | 75.0 (54.1, 91.7) | 91.7 (72.9, 100.0) | 75.0 (50.0, 83.3)  | 58.3 (41.6, 66.7) | 0.143     |
| Social section                 | 70.8 (33.3, 85.4)  | 55.6 (41.7, 72.9) | 79.2 (60.5, 91.7)  | 66.7 (41.7, 83.3)  | 83.3 (70.8, 83.3) | 0.654     |
| Treatment Burden section       | 77.8 (63.9, 80.6)  | 55.6 (55.6, 77.8) | 72.2 (58.4, 77.8)  | 66.7 (55.6, 77.8)  | 55.6 (50.0, 77.8) | 0.535     |
| Health section                 | 44.4 (33.3, 66.7)  | 33.3 (16.7, 58.3) | 38.8 (18.7, 68.8)  | 41.7 (27.1, 64.6)  | 50.0 (37.5, 50.0) | 0.509     |
| Respiration section            | 77.8 (66.7, 87.5)  | 66.7 (55.6, 82.4) | 74.1 (65.8, 75.9)  | 75.9 (63.5, 81.5)  | 66.7 (63.0, 74.1) | 0.643     |
| Vitamin D                      |                    |                   |                    |                    |                   |           |
| Vitamin D (ng/mL)              | 20.5 (11.7, 27.9)  | 20.5 (14.8, 29.9) | 13.4 (6.6, 24.6)   | 20.4 (15.9, 28.6)  | 17.8 (13.7, 21.0) | 0.313     |

1) GC1s-GC2 vs GC2-GC2, p=0.003; GC1s-GC1f vs GC1s-GC2, p=0.001

(2) GC1s-GC1f vs GC2-GC2, p=0.002
